# Supplementary material for: A Comparative Quantitative LC-MS/MS Profiling Analysis of Human Pancreatic Adenocarcinoma, Adjacent-Normal Tissue, and Patient-Derived Tumour Xenografts
Source: MDPI journal article supplement (doi:10.3390/proteomes6040045), 2018-11-06
Supplement: s1 [file s1]

| <u>Type of tissue specimen analysed</u> |                                                |        |                           |                 |        |    |    |
|-----------------------------------------|------------------------------------------------|--------|---------------------------|-----------------|--------|----|----|
| Patient I.D.                            | Original Patient                               | Gender | Age at surgical resection | Adjacent-Normal | Tumour | F1 | F2 |
| <i>PIN 65</i>                           | Tumour & normal invasive ductal adenocarcinoma | F      | 76                        | ✓               | ✓      | ✓  | ✓  |
| <i>PIN 80</i>                           | Tumour & normal invasive ductal adenocarcinoma | M      | 70                        | ✓               | ✓      | ✓  | ✓  |
| <i>PIN 89</i>                           | Tumour & normal invasive ductal adenocarcinoma | F      | 45                        | ✓               | ✓      | ✓  | ✓  |
| <i>PIN 91</i>                           | Tumour & normal invasive ductal adenocarcinoma | M      | 64                        | ✓               | ✓      | ✓  | ✓  |
| <i>PIN 99</i>                           | Tumour & normal invasive ductal adenocarcinoma | F      | 63                        | -               | -      | ✓  | ✓  |
| <i>PIN 116</i>                          | Tumour & normal invasive ductal carcinoma      | M      | 62                        | ✓               | ✓      | ✓  | -  |
| <i>PIN 120</i>                          | Invasive ductal adenoca–HOP (head of Pancreas) | M      | 65                        | ✓               | ✓      | ✓  | ✓  |
| <i>PIN 140</i>                          | Tumour & normal invasive ductal carcinoma      | M      | 63                        | ✓               | ✓      | -  | ✓  |
| <i>PIN 141</i>                          | Tumour & normal invasive ductal adenocarcinoma | M      | 82                        | ✓               | ✓      | ✓  | ✓  |
| <i>PIN 160</i>                          | Tumour & normal invasive ductal adenocarcinoma | F      | 77                        | ✓               | ✓      | ✓  | ✓  |
| <i>PIN 161</i>                          | Tumour & normal invasive ductal adenocarcinoma | M      | 61                        | ✓               | ✓      | ✓  | ✓  |

*Table 1: Characteristics of patients and tissue samples used for LC-MS/MS analysis.*
